# Supplementary material for: p66ShcA functions as a contextual promoter of breast cancer metastasis
Source: Springer Nature journal article supplement (doi:10.1186/s13058-020-1245-6), 2020-01-15
Supplement: MOESM1 [file 17680622]

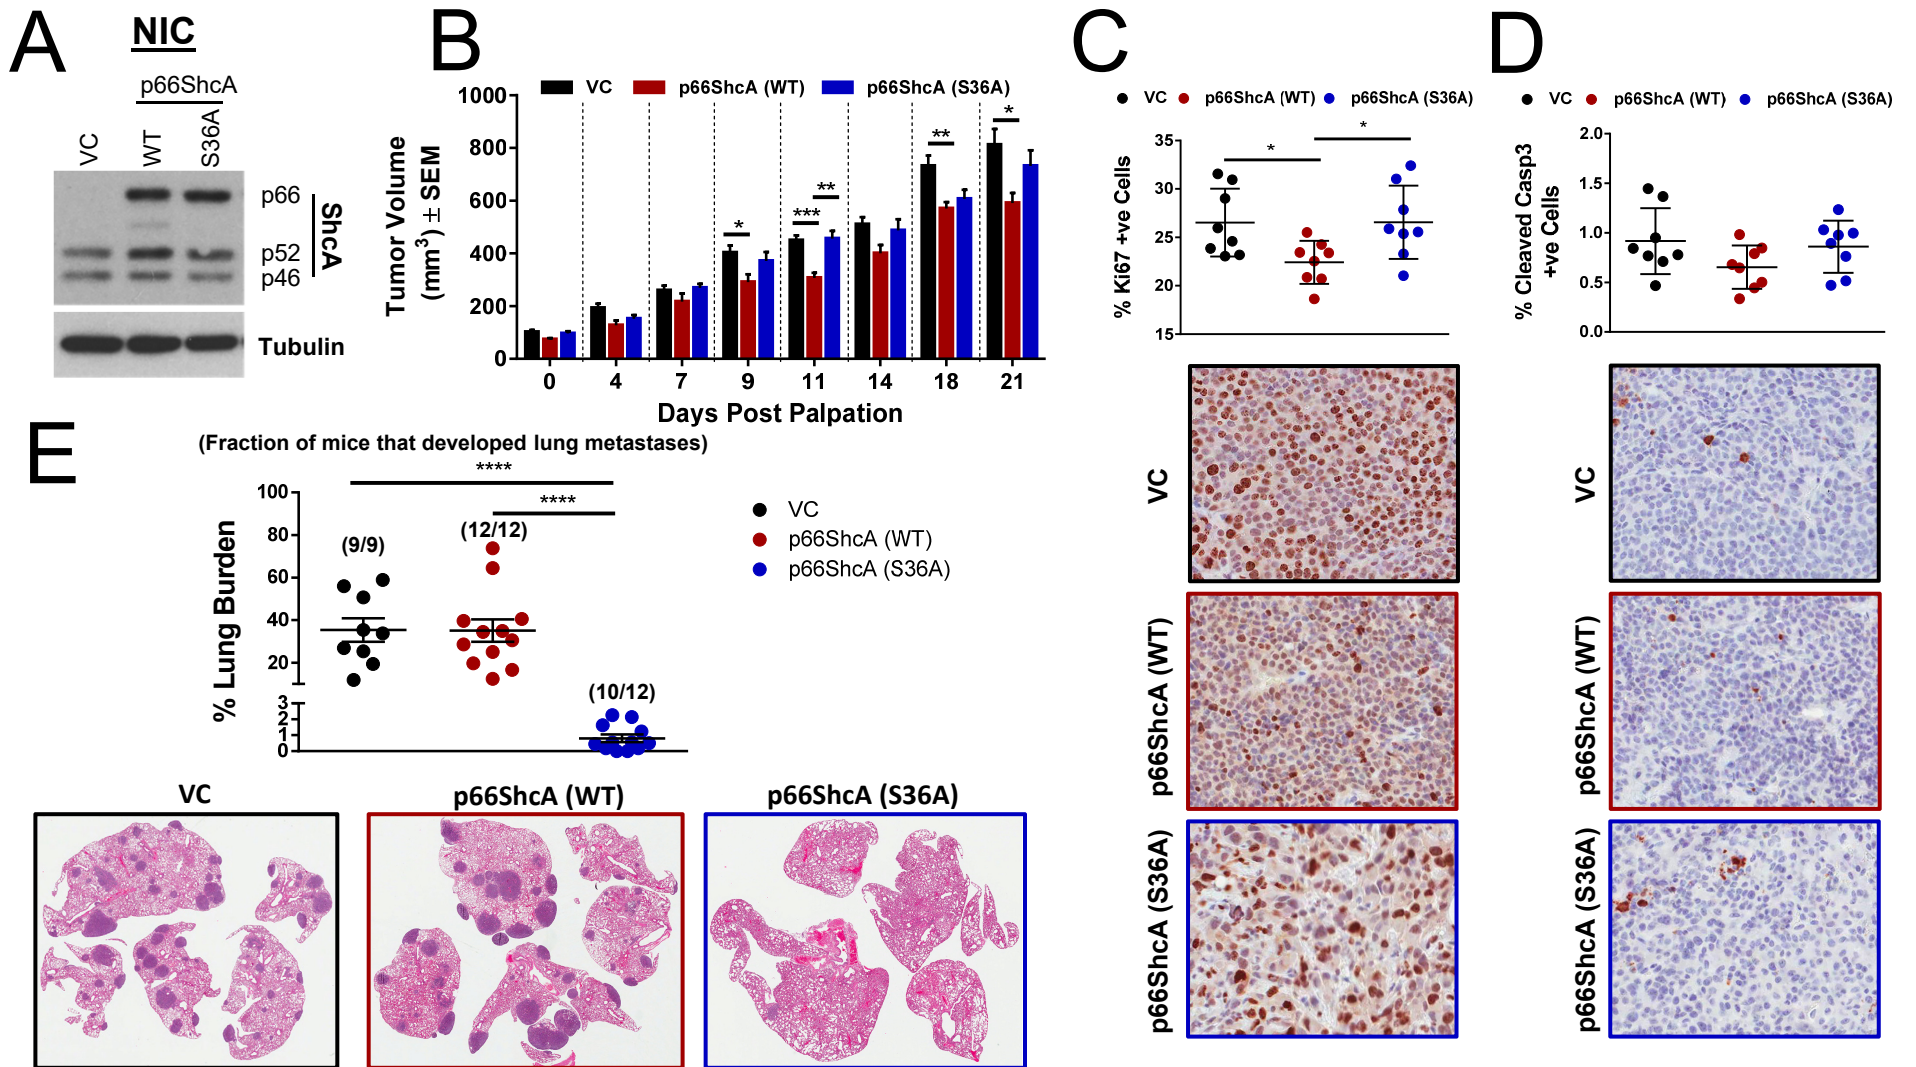

Figure S1
